# Supplementary material for: Looking into the Quantification of Forensic Samples with Real-Time PCR
Source: Preprints.org preprint supplement (doi:10.20944/preprints202405.0581.v1), 2024-05-09
Supplement: Supplementary file 1 [file supplementary]

## Sheet: Slope, Y, R2
		Y-Intercept	R2	Slope		sonda	Y-Intercept	R2	Slope		sonda	Y-Intercept	R2	Slope		sonda	Y-Intercept	R2	Slope
1	Small Autosomal	26.6188	0.999479	-3.2664		small	26.6188	0.999479	-3.2664		Y	26.1474	0.999554	-3.3267		large	23.4972	0.998596	-3.3638
	Y	26.1474	0.999554	-3.3267		small	25.2089	0.987312	-3.679		Y	24.6022	0.996013	-3.477		large	22.6434	0.99101	-3.662
	IPC					small	26.0674	0.998937	-3.347		Y	25.9629	0.997668	-3.287		large	23.1292	0.998397	-3.3398
	Large Autosomal	23.4972	0.998596	-3.3638		small	25.2777	0.999055	-3.1771		Y	24.5559	0.997493	-3.1711		large	23.1152	0.997878	-3.2728
						small	24.4962	0.993905	-3.3795		Y	24.6225	0.997248	-3.3873		large	22.8247	0.996922	-3.3694
2	Small Autosomal	25.2089	0.987312	-3.679		small	25.5773	0.99938	-3.3533		Y	25.5861	0.999205	-3.383		large	23.0317	0.998564	-3.4527
	Y	24.6022	0.996013	-3.477		small	25.4562	0.956102	-3.6074		Y	24.5434	0.977487	-3.459		large	22.1337	0.989093	-3.4771
	IPC					small	25.7945	0.998855	-3.3711		Y	25.3968	0.998927	-3.4354		large	22.8881	0.999173	-3.413
	Large Autosomal	22.6434	0.99101	-3.662		small	25.2089	0.987312	-3.679		Y	24.6022	0.996013	-3.477		large	22.6434	0.99101	-3.662
						small	24.8319	0.991615	-3.2036		Y	24.9907	0.994811	-3.2876		large	22.9992	0.999008	-3.307
3	Small Autosomal	26.0674	0.998937	-3.347		small	25.5045	0.999027	-3.3532		Y	24.4772	0.998412	-3.3113		large	22.7809	0.999636	-3.4376
	Y	25.9629	0.997668	-3.287		small	26.3259	0.999442	-3.412		Y	25.3036	0.999751	-3.3689		large	23.8054	0.998261	-3.5151
	IPC					small	25.0207	0.998592	-3.1465		Y	24.62	0.997813	-3.2365		large	22.6939	0.99745	-3.3018
	Large Autosomal	23.1292	0.998397	-3.3398		small	24.7951	0.999212	-3.311		Y	25.3105	0.998377	-3.2006		large	23.0381	0.998919	-3.3668
						small	25.7881	0.999051	-3.5602		Y	24.7434	0.999478	-3.4972		large	23.4408	0.999275	-3.6837
4	Small Autosomal	25.2777	0.999055	-3.1771		small	26.1915	0.999402	-3.3223		Y	25.5018	0.997373	-3.293		large	22.7954	0.997719	-3.5155
	Y	24.5559	0.997493	-3.1711		small	24.9601	0.996391	-3.3965		Y	25.5231	0.999257	-3.3723		large	22.6902	0.996938	-3.3868
	IPC					small	25.5551	0.976245	-3.3192		Y	25.7472	0.9736	-3.3671		large	23.2335	0.998681	-3.5654
	Large Autosomal	23.1152	0.997878	-3.2728		small	25.1842	0.998689	-3.3107		Y	24.9165	0.999236	-3.2175		large	22.9251	0.998422	-3.353
						small	25.5156	0.999358	-3.227		Y	24.3801	0.998249	-3.3341		large	22.7263	0.998644	-3.2981
5	Small Autosomal	24.4962	0.993905	-3.3795		minimo	24.4962	0.956102	-3.679		minimo	24.3801	0.9736	-3.4972		minimo	22.1337	0.989093	-3.6837
	Y	24.6225	0.997248	-3.3873		massimo	26.6188	0.999479	-3.1465		massimo	26.1474	0.999751	-3.1711		massimo	23.8054	0.999636	-3.2728
						medio	25.4689	0.993868	-3.3711		medio	25.0767	0.995798	-3.34448		medio	22.9518	0.99718	-3.43717
	IPC						R2					Y INTERCEPTOR							SLOPE
	Large Autosomal	22.8247	0.996922	-3.3694			minimal	maximum	media				minimal	maximum	media				minimal	maximum	media
						small autosomal (SA)	0.956102	0.999479	0.993868		small autosomal (SA)		24.4962	26.6188	25.4689		small autosomal (SA)		-3.679	-3.1465	-3.3711
6	Small Autosomal	25.5773	0.99938	-3.3533		large autosomal (LA)	0.989093	0.999636	0.99718		large autosomal (LA)		22.1337	23.8054	22.9518		large autosomal (LA)		-3.6837	-3.2728	-3.43717
	Y	25.5861	0.999205	-3.383		Y target (Y)	0.9736	0.999751	0.995798		Y target (Y)		24.3801	26.1474	25.0767		Y target (Y)		-3.4972	-3.1711	-3.34448
	IPC
	Large Autosomal	23.0317	0.998564	-3.4527
7	Small Autosomal	25.4562	0.956102	-3.6074
	Y	24.5434	0.977487	-3.459
	IPC
	Large Autosomal	22.1337	0.989093	-3.4771
8	Small Autosomal	25.7945	0.998855	-3.3711
	Y	25.3968	0.998927	-3.4354
	IPC
	Large Autosomal	22.8881	0.999173	-3.413
9	Small Autosomal	25.2089	0.987312	-3.679
	Y	24.6022	0.996013	-3.477
	IPC
	Large Autosomal	22.6434	0.99101	-3.662
10	Small Autosomal	24.8319	0.991615	-3.2036
	Y	24.9907	0.994811	-3.2876
	IPC
	Large Autosomal	22.9992	0.999008	-3.307
11	Small Autosomal	25.5045	0.999027	-3.3532
	Y	24.4772	0.998412	-3.3113
	IPC	26.6135	0.760005	-0.8443
	Large Autosomal	22.7809	0.999636	-3.4376
12	Small Autosomal	26.3259	0.999442	-3.412
	Y	25.3036	0.999751	-3.3689
	IPC
	Large Autosomal	23.8054	0.998261	-3.5151
13	Small Autosomal	25.0207	0.998592	-3.1465
	Y	24.62	0.997813	-3.2365
	IPC
	Large Autosomal	22.6939	0.99745	-3.3018
14	Small Autosomal	24.7951	0.999212	-3.311
	Y	25.3105	0.998377	-3.2006
	IPC
	Large Autosomal	23.0381	0.998919	-3.3668
15	Small Autosomal	25.7881	0.999051	-3.5602
	Y	24.7434	0.999478	-3.4972
	IPC
	Large Autosomal	23.4408	0.999275	-3.6837
16	Small Autosomal	26.1915	0.999402	-3.3223
	Y	25.5018	0.997373	-3.293
	IPC
	Large Autosomal	22.7954	0.997719	-3.5155
17	Small Autosomal	24.9601	0.996391	-3.3965
	Y	25.5231	0.999257	-3.3723
	IPC
	Large Autosomal	22.6902	0.996938	-3.3868
18	Small Autosomal	25.5551	0.976245	-3.3192
	Y	25.7472	0.9736	-3.3671
	IPC
	Large Autosomal	23.2335	0.998681	-3.5654
19	Small Autosomal	25.1842	0.998689	-3.3107
	Y	24.9165	0.999236	-3.2175
	IPC
	Large Autosomal	22.9251	0.998422	-3.353
20	Small Autosomal	25.5156	0.999358	-3.227
2022-10-28	Y	24.3801	0.998249	-3.3341
	IPC
	Large Autosomal	22.7263	0.998644	-3.2981

## Sheet: IPC
	1	2	3	4	5	6	7	8	9	10	11	12	13	14	15	16	17	18	19	20
50	24.3256	22.324	25.5356	21.3675	24.9067	25.0051	24.1983	22.697	25.5143	23.7189	24.1097	24.8521	22.1594	21.5884	24.2477	23.5025	27.4147	25.1825	27.5407	26.3056
50	24.8256	22.0221	25.4254	24.3934	26.0549	20.8999	24.7363	23.8327	26.4285	25.1838	25.5587	26.3575	22.6959	21.7159	24.1003	23.717	27.8704	25.8761	27.2868	26.3121
5	26.2267	25.2769	26.7595	26.3337	26.7304	26.6589	26.4353	27.0243	26.849	26.1585	26.3405	26.5869	25.1353	24.4812	25.9429	25.7043	26.9383	26.2973	26.9753	26.8151
5	26.3162	25.1047	26.9213	26.2789	26.9955	26.7459	26.3992	27.2449	26.8516	26.8221	26.7913	27.3264	25.6345	24.9934	26.4225	25.9702	27.4897	26.6792	27.4853	27.1846
0.5	27.6298	27.0189	27.9942	27.1142	27.916	27.8202	27.7668	27.9843	27.6313	27.4121	27.5657	27.8852	26.8473	26.4277	27.3356	27.1091	27.8867	27.5598	27.912	27.7927
0.5	27.344	26.6298	27.6786	27.3015	27.7731	27.676	27.4654	27.9903	27.9327	27.568	27.7125	27.9172	26.8777	26.4494	27.2289	27.271	27.9386	27.4499	27.9095	27.9205
0.005	28.0866	27.3388	28.1136	27.681	28.2982	28.127	28.0866	28.5228	27.672	27.9442	28.1247	28.1495	27.5378	27.1302	27.6505	26.9568	28.201	27.7007	28.1065	27.9656
0.005	28.0703	27.1247	28.2384	27.7897	28.2763	28.2282	28.0921	28.6513	28.1837	28.0087	28.0406	28.1291	27.4834	27.1008	27.7574	27.6159	28.2672	27.9531	28.2892	28.5097
0.005	28.0126	27.088	28.1598	27.9134	28.1956	28.2454	28.2122	28.7019	28.374	27.937	28.2929	28.3509	27.4208	26.9987	27.9385	27.8399	28.5241	28.1285	28.4537	28.403
0.005	28.2078	27.2607	28.3072	27.9217	28.4165	28.4382	28.2959	28.6001	28.1898	27.9227	28.0404	28.1085	27.3996	28.7119	27.9123	27.5053	28.4521	28.0572	28.3417	28.3326
samples	28.0908	26.9126	28.3029	28.0912	26.5736	28.1089	28.1206	28.4378	28.4087	28.2374	26.3944	27.5464	27.2617	27.0698	27.6489	27.4484	27.4756	28.2114	28.0415	28.141
	28.0955	25.2975	28.4235	27.7195	28.015	28.4053	27.97	28.4957	28.2546	28.1354	27.0652	27.1027	27.4488	27.0198	27.65	27.3364	28.2927	28.3173	28.1747	28.1163
	28.0501	27.291	28.3867	27.6582	28.1952	28.0487	27.8428	28.3887	28.2894	28.0968	28.1236	27.3038	27.4322	26.9899	28.0951	27.6118	27.7076	28.2742	28.2859	28.2593
	27.6109	27.2949	27.8211	27.7893	28.0632	27.9603	27.7728	28.237	27.9284	28.1972	27.927	27.6104	27.3079	27.1102	27.253	27.5519	28.4684	28.5267	28.1897	28.0023
	27.9965	26.9054	28.3567	27.7045	28.2988	28.0636	27.9582	28.5347	27.8664	28.241	27.9352	27.6544	26.2827	26.7537	27.5326	27.6436	28.3097	28.3295	28.8518	28.0985
	27.9717	26.7101	28.1462	27.479	28.1881	28.1861	27.8729	28.5608	28.0655	28.1415	28.0313	28.0828	27.4054	26.8052	27.6466	26.8227	28.1977	27.9182	28.2592	28.0875
	27.4823	25.7845	28.1789	27.6468	27.9956	28.445	28.231	27.5258	27.5186	28.0341	27.8806	28.187	27.4511	27.1558	26.2647	27.7335	28.172	28.0978	28.3601	27.9366
	27.7632	27.1419	28.0627	28.1952	28.2096	27.9482	27.9812	28.4647	28.2233	28.1172	27.9325	27.8593	26.7607	27.2507	27.8831	27.7441	27.7568	27.87	27.9196	28.2412
	27.5999	26.5632	28.1724	27.6886	27.9762	28.1832	28.2248	27.2964	28.3499	28.0409	28.662	28.2503	27.6152	26.89	27.9874	26.8617	27.7466	28.5454	28.3284	27.7487
	27.9019	26.8798	28.3875	27.6573	28.0132	28.3228	28.148	28.5105	28.2153	27.9633	27.7969	28.0095	27.4471		27.2353	26.6578	28.4444	27.9532	28.2767	28.1912
	27.0115	27.1084	28.1716	27.268	27.8745	28.3043	28.0073	28.7643	28.2888	28.0521	28.0601	27.5098	25.956		27.8832	26.9901	28.6279	28.1737	28.3667	28.3273
	27.328	26.5438	28.0737	27.6813	28.3149	27.8849	28.072	28.3903	27.7808	27.6156	27.6123	27.2742	25.8354		27.7689	27.5633	27.9309	27.9783	28.2483	28.2343
	26.8968	26.6925	28.1875	27.6444	28.0197	28.1185	27.899	28.5589	28.3104	27.5314	27.8949	28.1128	27.1258		27.9016	27.2195	27.7404	28.1527	28.4296	28.3589
	27.538	26.8634	28.3761	27.354	28.2742	28.3007	27.1022	28.6192	28.6201	28.0135	27.5112	28.1048	26.6901		27.499	27.4812	28.4302	27.8945	28.5049	28.1515
	27.6367	27.1153	28.3814	28.1906	28.277	28.1443	27.8601	28.4835	28.3859	29.0423	27.5911	27.8742	27.2021		27.9156	27.3582	28.0677	28.0092	28.5303	28.2192
	27.3102	27.0126	28.3069	27.4966	28.5829	28.3877	27.9697	28.1816	27.9715	27.949	27.8574	28.1846	26.3309		27.9632	27.956	28.1197	27.9007	28.4196	28.3075
	26.337	26.6492	27.9684	27.8293	28.2531	28.1922	27.4538	29.3896	28.5182	27.4988	27.218	27.4991	27.0694		27.9826	27.515	28.051	28.0975	28.3221	28.3624
	26.531	27.0236	28.2734	27.5158	28.5582	28.1429	26.9096	28.0131	28.4503	28.0222	27.6301	28.1602	27.3041		27.6706	27.4261	28.4153	27.7632	28.288	28.2992
	28.1016	27.2276	28.2929	27.801	28.3565	28.0662	27.6557	27.8749		27.9824	27.5221	28.2412	27.3014		28.2631	27.3875	27.9837	27.9798	28.558	27.9995
		27.0903	28.4236	27.7041	28.2974	28.3022	28.0382	26.9733		27.8284	27.868		27.4733		27.9688	27.3631	27.9003	27.7897	28.6312	28.116
		27.1006	28.4161	27.5215	27.8309	27.3678	27.3614	28.2877		28.2501	26.2842				28.0163	27.3447	28.0597	28.1692	28.3832	28.3063
		27.3465	28.3292	27.5521	27.4756	28.3327	28.4322	27.8708		27.9749	27.0693				27.9931	27.1275	27.6115	26.7547	28.3401	28.4362
		26.9247	28.2437	27.957	27.9463	28.2603	27.6199	28.2153		28.1416	27.8649				27.9133	27.4253	27.8928	28.3478	28.0577	28.5652
		26.7566	28.2991	25.4145	27.9225	28.4425	28.1148	28.6682		28.0371	27.6298				27.5803	27.2918	28.1467	27.4605	28.1624	28.5471
		27.3335	28.3092	25.9224	28.1635	27.6251	27.6621	28.5236		26.8142	27.732				27.7201	26.887	28.1397	28.0032	27.6346	28.506
		26.4894	28.0906	26.6535	28.039	27.6736	27.3543	27.6729		27.1248	27.8959				27.3463	27.1022	28.5379	27.4608	28.1828	28.1555
		27.0658	28.2089	26.5005	28.0414		26.44	27.4569		27.2508	28.0134				27.9085	26.8964	28.0154	27.9472	28.0949	28.2065
		23.0297	28.2373	26.5382	27.6395		27.83	27.6517		27.1681	28.103				28.1575	27.7511	27.5388	27.7978	28.1894	28.4256
		24.6672	28.2765	26.9733	28.1283		28.0309	28.056		26.9275	27.9416				27.978	27.5615	28.1517	28.251	28.0847	28.2253
		26.8234	27.7849	27.7416	28.2456		27.8521	28.4766		27.2817	27.803				27.6683	27.1456	28.1858	28.1162	28.3423	28.3288
			28.3453	27.5697	28.3066		27.8412	28.5979		27.0918					27.7732	27.4302	28.1846	27.7822	28.0904	28.4563
			28.4449	28.0229	28.2895		27.8951	28.1193		27.2289					27.5156	27.4787	28.0537	27.4468	28.1572
			27.6856	28.0728	28.2694		28.1298	28.3522		27.6292					27.5529	25.6621	28.1888	28.2067	28.6201
				27.8512	27.793		27.957	28.6139		27.9315					27.7189	27.5762	28.4666	27.7937	28.2247
				27.5825	28.3426		27.6221	28.6295		27.6946					27.8858	27.585	28.4522	28.1179	28.3149
				26.7115	28.0873		28.0796	28.6262		27.9824					28.9168	27.5989	28.1738	27.7537	28.5822
				27.6768	27.972		28.1294	28.1809		27.3765					26.8812	27.7999	27.9129	28.2436	28.3554
				27.3157	27.9346		28.033	28.8186		27.8212					27.2291	27.3373	27.8661	27.8646	27.5029
				27.3849	28.0816		27.8602	Undetermined		27.0713					27.5122	27.5044	28.1417	28.088	28.431
				27.5721	27.5627		27.9183	28.1953		27.0913					27.1463	26.3816	27.8548	27.6056	28.0834
				27.9641	28.0156		26.1792	28.4194							25.0354	27.6647	26.9908	28.0632	28.0565
				27.5963	28.1377		27.5343	28.5891							26.2571	27.6042	27.8981	28.2004	28.0814
				27.5466	28.2943		27.7155	28.3164							26.4651	27.5474	28.2059	27.7398	27.6803
				26.1897	28.3187		28.0734	28.8881								27.4192	27.9934	28.2139	27.8781
				26.4514	28.4647		27.2501	28.6758								27.7844	28.177	28.325	28.0799
				27.0844	27.9766		27.4164	27.5696								27.7915	28.5715	28.2901	28.3467
				25.9972	28.3031		27.1352	28.3967								27.8127	29.0818	28.3306	28.5485
				26.1053	28.0918		27.0962	27.91								23.0174	28.4535	28.158	28.2617
				26.5805	28.1275		27.0017									27.9659	28.237		28.4128
				26.8907	28.3053		27.0441									27.7695	28.7057
				26.7152	28.1833		27.3889									27.7571	28.6361
				25.796	Undetermined		27.2728									25.1557
				26.8841	28.3897		27.6216									27.9733
				25.3393	27.3986		28.0727									27.6962
				26.4941	28.4469		28.2524									27.6099
				26.6712	27.8574		26.8922									27.829
				27.1953	27.656		28.2036									27.6644
				27.9389												27.736
				27.9921												27.5989
				27.7107												28.1568
				27.5887												27.4852
				27.5682												26.4118
				28.3158												26.6034
																27.2613
																27.2543
																24.3048
																25.5858
																27.2051

## Sheet: standard come campioni
Well	Well Position	Sample	Quantity	Target	Cq	Cq Mean	Cq Confidence	Cq SD	Quantity Mean	Quantity SD	Auto Threshold	Threshold	Auto Baseline	Baseline Start	Baseline End	Tm1	Tm2	Tm3	Tm4	Y-Intercept	R2	Slope	Efficiency	Standard Deviation	Standard Error	Omit
4	A4	1	46.8098	Small Autosomal	20.6267	20.6267	0.983172		46.8098	0	TRUE	25645	TRUE	3	15					26.3259	0.999442	-3.412	96.3755	0.127462	0.0285014	FALSE
4	A4	1	44.9684	Y	19.7351	19.7351	0.966224		44.9684	0	TRUE	24038.3	TRUE	3	15					25.3036	0.999751	-3.3689	98.0753	0.084085	0.018802	FALSE
4	A4	1		IPC	26.3944	26.3944	0.363792			0	TRUE	23685.7	TRUE	3	18											FALSE
4	A4	1	52.2004	Large Autosomal	17.7676	17.7676	0.988723		52.2004	0	TRUE	17951.2	TRUE	3	11					23.8054	0.998261	-3.5151	92.5247	0.231951	0.0518659	FALSE
5	A5	1bis	53.7451	Small Autosomal	20.422	20.422	0.957102		53.7451	0	TRUE	25645	TRUE	3	14					26.3259	0.999442	-3.412	96.3755	0.127462	0.0285014	FALSE
5	A5	1bis	51.1175	Y	19.5476	19.5476	0.942565		51.1175	0	TRUE	24038.3	TRUE	3	14					25.3036	0.999751	-3.3689	98.0753	0.084085	0.018802	FALSE
5	A5	1bis		IPC	26.2842	26.2842	0.348759			0	TRUE	23685.7	TRUE	3	17											FALSE
5	A5	1bis	53.2594	Large Autosomal	17.7369	17.7369	0.981967		53.2594	0	TRUE	17951.2	TRUE	3	11					23.8054	0.998261	-3.5151	92.5247	0.231951	0.0518659	FALSE
16	B4	2	4.86965	Small Autosomal	23.9802	23.9802	0.961139		4.86965	0	TRUE	25645	TRUE	3	17					26.3259	0.999442	-3.412	96.3755	0.127462	0.0285014	FALSE
16	B4	2	4.92238	Y	22.9717	22.9717	0.971973		4.92238	0	TRUE	24038.3	TRUE	3	16					25.3036	0.999751	-3.3689	98.0753	0.084085	0.018802	FALSE
16	B4	2		IPC	27.0693	27.0693	0.654946			0	TRUE	23685.7	TRUE	3	20											FALSE
16	B4	2	5.17139	Large Autosomal	21.297	21.297	0.980743		5.17139	0	TRUE	17951.2	TRUE	3	16					23.8054	0.998261	-3.5151	92.5247	0.231951	0.0518659	FALSE
17	B5	2bis	2.99742	Small Autosomal	24.6992	24.6992	0.903649		2.99742	0	TRUE	25645	TRUE	3	17					26.3259	0.999442	-3.412	96.3755	0.127462	0.0285014	FALSE
17	B5	2bis	4.17221	Y	23.2136	23.2136	0.945512		4.17221	0	TRUE	24038.3	TRUE	3	16					25.3036	0.999751	-3.3689	98.0753	0.084085	0.018802	FALSE
17	B5	2bis		IPC	27.8649	27.8649	0.675952			0	TRUE	23685.7	TRUE	3	21											FALSE
17	B5	2bis	4.59877	Large Autosomal	21.4761	21.4761	0.959753		4.59877	0	TRUE	17951.2	TRUE	3	15					23.8054	0.998261	-3.5151	92.5247	0.231951	0.0518659	FALSE
28	C4	3	0.482494	Small Autosomal	27.4058	27.4058	0.931298		0.482494	0	TRUE	25645	TRUE	3	21					26.3259	0.999442	-3.412	96.3755	0.127462	0.0285014	FALSE
28	C4	3	0.501163	Y	26.3143	26.3143	0.939133		0.501163	0	TRUE	24038.3	TRUE	3	21					25.3036	0.999751	-3.3689	98.0753	0.084085	0.018802	FALSE
28	C4	3		IPC	27.6298	27.6298	0.919651			0	TRUE	23685.7	TRUE	3	21											FALSE
28	C4	3	0.569323	Large Autosomal	24.6653	24.6653	0.967681		0.569323	0	TRUE	17951.2	TRUE	3	17					23.8054	0.998261	-3.5151	92.5247	0.231951	0.0518659	FALSE
29	C5	3bis	0.343477	Small Autosomal	27.9094	27.9094	0.865987		0.343477	0	TRUE	25645	TRUE	3	20					26.3259	0.999442	-3.412	96.3755	0.127462	0.0285014	FALSE
29	C5	3bis	0.381796	Y	26.7124	26.7124	0.926559		0.381796	0	TRUE	24038.3	TRUE	3	22					25.3036	0.999751	-3.3689	98.0753	0.084085	0.018802	FALSE
29	C5	3bis		IPC	27.732	27.732	0.873145			0	TRUE	23685.7	TRUE	3	21											FALSE
29	C5	3bis	0.472292	Large Autosomal	24.9506	24.9506	0.974372		0.472292	0	TRUE	17951.2	TRUE	3	18					23.8054	0.998261	-3.5151	92.5247	0.231951	0.0518659	FALSE
40	D4	4	0.0512636	Small Autosomal	30.728	30.728	0.941046		0.0512636	0	TRUE	25645	TRUE	3	23					26.3259	0.999442	-3.412	96.3755	0.127462	0.0285014	FALSE
40	D4	4	0.0546854	Y	29.5556	29.5556	0.960498		0.0546854	0	TRUE	24038.3	TRUE	3	24					25.3036	0.999751	-3.3689	98.0753	0.084085	0.018802	FALSE
40	D4	4		IPC	27.8959	27.8959	0.947941			0	TRUE	23685.7	TRUE	3	21											FALSE
40	D4	4	0.0702714	Large Autosomal	27.8591	27.8591	0.970803		0.0702714	0	TRUE	17951.2	TRUE	3	21					23.8054	0.998261	-3.5151	92.5247	0.231951	0.0518659	FALSE
41	D5	4bis	0.0383368	Small Autosomal	31.1586	31.1586	0.936799		0.0383368	0	TRUE	25645	TRUE	3	25					26.3259	0.999442	-3.412	96.3755	0.127462	0.0285014	FALSE
41	D5	4bis	0.0395917	Y	30.0281	30.0281	0.956723		0.0395917	0	TRUE	24038.3	TRUE	3	23					25.3036	0.999751	-3.3689	98.0753	0.084085	0.018802	FALSE
41	D5	4bis		IPC	28.0134	28.0134	0.943097			0	TRUE	23685.7	TRUE	3	20											FALSE
41	D5	4bis	0.0445426	Large Autosomal	28.5551	28.5551	0.969162		0.0445426	0	TRUE	17951.2	TRUE	3	22					23.8054	0.998261	-3.5151	92.5247	0.231951	0.0518659	FALSE
52	E4	5	0.00306088	Small Autosomal	34.9042	34.9042	0.912731		0.00306088	0	TRUE	25645	TRUE	3	25					26.3259	0.999442	-3.412	96.3755	0.127462	0.0285014	FALSE
52	E4	5	0.00396256	Y	33.3958	33.3958	0.953331		0.00396256	0	TRUE	24038.3	TRUE	3	27					25.3036	0.999751	-3.3689	98.0753	0.084085	0.018802	FALSE
52	E4	5		IPC	28.103	28.103	0.956881			0	TRUE	23685.7	TRUE	3	22											FALSE
52	E4	5	0.00244129	Large Autosomal	32.9882	32.9882	0.953181		0.00244129	0	TRUE	17951.2	TRUE	3	26					23.8054	0.998261	-3.5151	92.5247	0.231951	0.0518659	FALSE
53	E5	5bis	0.00372043	Small Autosomal	34.615	34.615	0.89207		0.00372043	0	TRUE	25645	TRUE	3	26					26.3259	0.999442	-3.412	96.3755	0.127462	0.0285014	FALSE
53	E5	5bis	0.00501347	Y	33.0516	33.0516	0.946927		0.00501347	0	TRUE	24038.3	TRUE	3	26					25.3036	0.999751	-3.3689	98.0753	0.084085	0.018802	FALSE
53	E5	5bis		IPC	27.9416	27.9416	0.953666			0	TRUE	23685.7	TRUE	3	21											FALSE
53	E5	5bis	0.00508263	Large Autosomal	31.8687	31.8687	0.964755		0.00508263	0	TRUE	17951.2	TRUE	3	23					23.8054	0.998261	-3.5151	92.5247	0.231951	0.0518659	FALSE
1	A1	ST1	50	Small Autosomal	20.7332	20.6271	0.898319	0.149968			TRUE	25645	TRUE	3	13					26.3259	0.999442	-3.412	96.3755	0.127462	0.0285014	FALSE
1	A1	ST1	50	Y	19.6514	19.6684	0.915811	0.0240991			TRUE	24038.3	TRUE	3	14					25.3036	0.999751	-3.3689	98.0753	0.084085	0.018802	FALSE
1	A1	ST1		IPC	24.1097		0.186505				TRUE	23685.7	TRUE	3	18											FALSE
1	A1	ST1	50	Large Autosomal	18.1149	18.0177	0.961664	0.137433			TRUE	17951.2	TRUE	3	11					23.8054	0.998261	-3.5151	92.5247	0.231951	0.0518659	FALSE
2	A2	ST1	50	Small Autosomal	20.5211	20.6271	0.927726	0.149968			TRUE	25645	TRUE	3	14					26.3259	0.999442	-3.412	96.3755	0.127462	0.0285014	FALSE
2	A2	ST1	50	Y	19.6854	19.6684	0.91996	0.0240991			TRUE	24038.3	TRUE	3	14					25.3036	0.999751	-3.3689	98.0753	0.084085	0.018802	FALSE
2	A2	ST1		IPC	25.5587		0.235798				TRUE	23685.7	TRUE	3	18											FALSE
2	A2	ST1	50	Large Autosomal	17.9206	18.0177	0.968528	0.137433			TRUE	17951.2	TRUE	3	11					23.8054	0.998261	-3.5151	92.5247	0.231951	0.0518659	FALSE
13	B1	ST2	5	Small Autosomal	23.8517	23.8429	0.916611	0.0124456			TRUE	25645	TRUE	3	18					26.3259	0.999442	-3.412	96.3755	0.127462	0.0285014	FALSE
13	B1	ST2	5	Y	22.8415	22.8809	0.935118	0.0557541			TRUE	24038.3	TRUE	3	17					25.3036	0.999751	-3.3689	98.0753	0.084085	0.018802	FALSE
13	B1	ST2		IPC	26.3405		0.6046				TRUE	23685.7	TRUE	3	20											FALSE
13	B1	ST2	5	Large Autosomal	21.1967	21.1484	0.969182	0.0683186			TRUE	17951.2	TRUE	3	15					23.8054	0.998261	-3.5151	92.5247	0.231951	0.0518659	FALSE
14	B2	ST2	5	Small Autosomal	23.8341	23.8429	0.938774	0.0124456			TRUE	25645	TRUE	3	16					26.3259	0.999442	-3.412	96.3755	0.127462	0.0285014	FALSE
14	B2	ST2	5	Y	22.9203	22.8809	0.950458	0.0557541			TRUE	24038.3	TRUE	3	15					25.3036	0.999751	-3.3689	98.0753	0.084085	0.018802	FALSE
14	B2	ST2		IPC	26.7913		0.610913				TRUE	23685.7	TRUE	3	20											FALSE
14	B2	ST2	5	Large Autosomal	21.1001	21.1484	0.974808	0.0683186			TRUE	17951.2	TRUE	3	14					23.8054	0.998261	-3.5151	92.5247	0.231951	0.0518659	FALSE
25	C1	ST3	0.5	Small Autosomal	27.1755	27.2578	0.948475	0.116423			TRUE	25645	TRUE	3	21					26.3259	0.999442	-3.412	96.3755	0.127462	0.0285014	FALSE
25	C1	ST3	0.5	Y	26.1783	26.2237	0.963414	0.0642295			TRUE	24038.3	TRUE	3	21					25.3036	0.999751	-3.3689	98.0753	0.084085	0.018802	FALSE
25	C1	ST3		IPC	27.5657		0.929856				TRUE	23685.7	TRUE	3	21											FALSE
25	C1	ST3	0.5	Large Autosomal	24.7201	24.7182	0.970476	0.00275785			TRUE	17951.2	TRUE	3	18					23.8054	0.998261	-3.5151	92.5247	0.231951	0.0518659	FALSE
26	C2	ST3	0.5	Small Autosomal	27.3402	27.2578	0.953253	0.116423			TRUE	25645	TRUE	3	21					26.3259	0.999442	-3.412	96.3755	0.127462	0.0285014	FALSE
26	C2	ST3	0.5	Y	26.2691	26.2237	0.955472	0.0642295			TRUE	24038.3	TRUE	3	21					25.3036	0.999751	-3.3689	98.0753	0.084085	0.018802	FALSE
26	C2	ST3		IPC	27.7125		0.937936				TRUE	23685.7	TRUE	3	21											FALSE
26	C2	ST3	0.5	Large Autosomal	24.7162	24.7182	0.97002	0.00275785			TRUE	17951.2	TRUE	3	17					23.8054	0.998261	-3.5151	92.5247	0.231951	0.0518659	FALSE
37	D1	ST4	0.05	Small Autosomal	30.9032	30.8579	0.896133	0.0639913			TRUE	25645	TRUE	3	24					26.3259	0.999442	-3.412	96.3755	0.127462	0.0285014	FALSE
37	D1	ST4	0.05	Y	29.7396	29.7244	0.933166	0.0215456			TRUE	24038.3	TRUE	3	22					25.3036	0.999751	-3.3689	98.0753	0.084085	0.018802	FALSE
37	D1	ST4		IPC	28.1247		0.913829				TRUE	23685.7	TRUE	3	20											FALSE
37	D1	ST4	0.05	Large Autosomal	28.4628	28.5319	0.950002	0.0977813			TRUE	17951.2	TRUE	3	21					23.8054	0.998261	-3.5151	92.5247	0.231951	0.0518659	FALSE
38	D2	ST4	0.05	Small Autosomal	30.8127	30.8579	0.974967	0.0639913			TRUE	25645	TRUE	3	24					26.3259	0.999442	-3.412	96.3755	0.127462	0.0285014	FALSE
38	D2	ST4	0.05	Y	29.7092	29.7244	0.986242	0.0215456			TRUE	24038.3	TRUE	3	21					25.3036	0.999751	-3.3689	98.0753	0.084085	0.018802	FALSE
38	D2	ST4		IPC	28.0406		0.962197				TRUE	23685.7	TRUE	3	22											FALSE
38	D2	ST4	0.05	Large Autosomal	28.6011	28.5319	0.979701	0.0977813			TRUE	17951.2	TRUE	3	21					23.8054	0.998261	-3.5151	92.5247	0.231951	0.0518659	FALSE
49	E1	ST5	0.005	Small Autosomal	34.0906	34.1794	0.9006	0.125516			TRUE	25645	TRUE	3	28					26.3259	0.999442	-3.412	96.3755	0.127462	0.0285014	FALSE
49	E1	ST5	0.005	Y	33.1036	33.0913	0.936899	0.0173402			TRUE	24038.3	TRUE	3	26					25.3036	0.999751	-3.3689	98.0753	0.084085	0.018802	FALSE
49	E1	ST5		IPC	28.2929		0.946781				TRUE	23685.7	TRUE	3	22											FALSE
49	E1	ST5	0.005	Large Autosomal	31.6188	31.9015	0.951579	0.399872			TRUE	17951.2	TRUE	3	23					23.8054	0.998261	-3.5151	92.5247	0.231951	0.0518659	FALSE
50	E2	ST5	0.005	Small Autosomal	34.2681	34.1794	0.941559	0.125516			TRUE	25645	TRUE	3	28					26.3259	0.999442	-3.412	96.3755	0.127462	0.0285014	FALSE
50	E2	ST5	0.005	Y	33.079	33.0913	0.961613	0.0173402			TRUE	24038.3	TRUE	3	27					25.3036	0.999751	-3.3689	98.0753	0.084085	0.018802	FALSE
50	E2	ST5		IPC	28.0404		0.956385				TRUE	23685.7	TRUE	3	22											FALSE
50	E2	ST5	0.005	Large Autosomal	32.1843	31.9015	0.957518	0.399872			TRUE	17951.2	TRUE	3	25					23.8054	0.998261	-3.5151	92.5247	0.231951	0.0518659	FALSE

## Sheet: standard come campioni risultat
				Sample	Quantity	Target	Cq		Sample	Quantity	Target	Cq	log	media
				1	46.8098	Small Autosomal	20.6267		ST1	50	Small Autosomal	20.7332	1.31667	1.31443
				1	44.9684	Y	19.7351		ST1	50	Y	19.6514	1.29339	1.29377
				1		IPC	26.3944		ST1		IPC	24.1097	1.38219	1.39487
				1	52.2004	Large Autosomal	17.7676		ST1	50	Large Autosomal	18.1149	1.25804	1.25569
				1bis	53.7451	Small Autosomal	20.422		ST1	50	Small Autosomal	20.5211	1.3122
				1bis	51.1175	Y	19.5476		ST1	50	Y	19.6854	1.29414
				1bis		IPC	26.2842		ST1		IPC	25.5587	1.40754
				1bis	53.2594	Large Autosomal	17.7369		ST1	50	Large Autosomal	17.9206	1.25335
				2	4.86965	Small Autosomal	23.9802		ST2	5	Small Autosomal	23.8517	1.37752	1.37736
				2	4.92238	Y	22.9717		ST2	5	Y	22.8415	1.35872	1.35947
				2		IPC	27.0693		ST2		IPC	26.3405	1.42062	1.42431
				2	5.17139	Large Autosomal	21.297		ST2	5	Large Autosomal	21.1967	1.32627	1.32528
				2bis	2.99742	Small Autosomal	24.6992		ST2	5	Small Autosomal	23.8341	1.3772
				2bis	4.17221	Y	23.2136		ST2	5	Y	22.9203	1.36022
				2bis		IPC	27.8649		ST2		IPC	26.7913	1.42799
				2bis	4.59877	Large Autosomal	21.4761		ST2	5	Large Autosomal	21.1001	1.32428
				3	0.482494	Small Autosomal	27.4058		ST3	0.5	Small Autosomal	27.1755	1.43418	1.43549
				3	0.501163	Y	26.3143		ST3	0.5	Y	26.1783	1.41794	1.41869
				3		IPC	27.6298		ST3		IPC	27.5657	1.44037	1.44152
				3	0.569323	Large Autosomal	24.6653		ST3	0.5	Large Autosomal	24.7201	1.39305	1.39302
				3bis	0.343477	Small Autosomal	27.9094		ST3	0.5	Small Autosomal	27.3402	1.4368
				3bis	0.381796	Y	26.7124		ST3	0.5	Y	26.2691	1.41945
				3bis		IPC	27.732		ST3		IPC	27.7125	1.44268
				3bis	0.472292	Large Autosomal	24.9506		ST3	0.5	Large Autosomal	24.7162	1.39298
				4	0.0512636	Small Autosomal	30.728		ST4	0.05	Small Autosomal	30.9032	1.49	1.48937
				4	0.0546854	Y	29.5556		ST4	0.05	Y	29.7396	1.47334	1.47311
				4		IPC	27.8959		ST4		IPC	28.1247	1.44909	1.44844
				4	0.0702714	Large Autosomal	27.8591		ST4	0.05	Large Autosomal	28.4628	1.45428	1.45533
				4bis	0.0383368	Small Autosomal	31.1586		ST4	0.05	Small Autosomal	30.8127	1.48873
				4bis	0.0395917	Y	30.0281		ST4	0.05	Y	29.7092	1.47289
				4bis		IPC	28.0134		ST4		IPC	28.0406	1.44779
				4bis	0.0445426	Large Autosomal	28.5551		ST4	0.05	Large Autosomal	28.6011	1.45638
				5	0.00306088	Small Autosomal	34.9042		ST5	0.005	Small Autosomal	34.0906	1.53263	1.53376
				5	0.00396256	Y	33.3958		ST5	0.005	Y	33.1036	1.51987	1.51971
				5		IPC	28.103		ST5		IPC	28.2929	1.45168	1.44973
				5	0.00244129	Large Autosomal	32.9882		ST5	0.005	Large Autosomal	31.6188	1.49994	1.50379
				5bis	0.00372043	Small Autosomal	34.615		ST5	0.005	Small Autosomal	34.2681	1.53489
				5bis	0.00501347	Y	33.0516		ST5	0.005	Y	33.079	1.51955
				5bis		IPC	27.9416		ST5		IPC	28.0404	1.44778
				5bis	0.00508263	Large Autosomal	31.8687		ST5	0.005	Large Autosomal	32.1843	1.50764
